# Supplementary material for: Pd–Ni nanoparticles supported on reduced graphene oxides as catalysts for hydrogen generation from hydrazine
Source: Royal Society of Chemistry journal article supplement (doi:10.1039/c7ra04390b), 2017-01-01
Supplement: c7ra04390b1.pdf [file c7ra04390b1.pdf]

Electronic Supplementary Information (ESI) for RSC Advances

## **Pd-Ni Nanoparticles Supported on Reduced Graphene Oxides as Catalysts for Hydrogen Generation from Hydrazine**

Ya Chen,<sup>a</sup> Ling Wang,<sup>b</sup> Yanan Zhai,<sup>b</sup> Heyin Chen,<sup>b</sup> Yibo Dou,<sup>a</sup> Jianrong Li,<sup>\*a</sup> Haoquan Zheng,<sup>\*b</sup> and  
Rui Cao<sup>\*a,b</sup>

<sup>a</sup> *Beijing Key Laboratory for Green Catalysis and Separation and Department of Chemistry and Chemical Engineering,  
College of Environmental and Energy Engineering, Beijing University of Technology, Beijing 100124, P. R. China*

<sup>b</sup> *Key Laboratory of Applied Surface and Colloid Chemistry, Ministry of Education, School of Chemistry and Chemical  
Engineering, Shaanxi Normal University, Xi'an 710119, China.*

† *Corresponding authors: ruicao@ruc.edu.cn, zhenghaoquan@snnu.edu.cn, jrli@bjut.edu.cn.*

### **SUPPORTING INFORMATION**

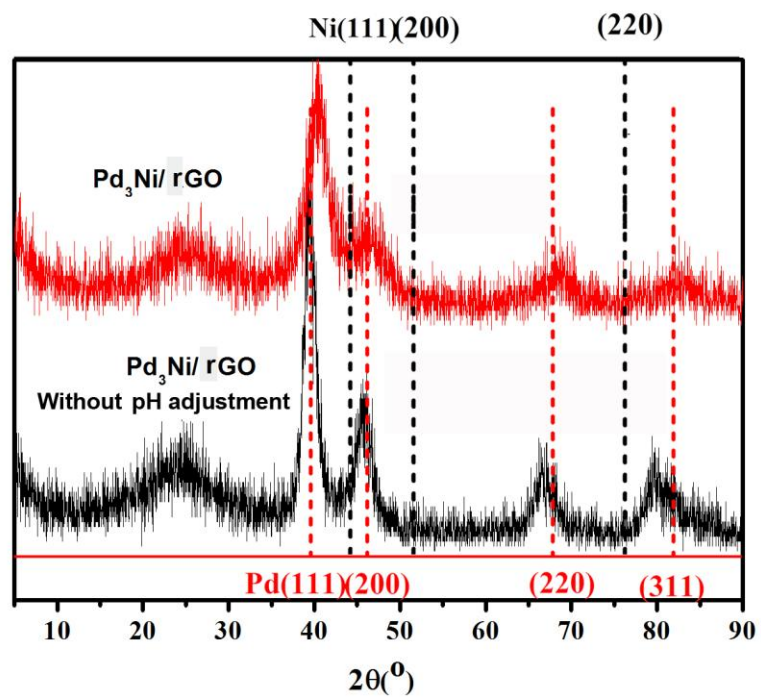

**Fig. S1.** XRD patterns of Pd<sub>3</sub>Ni/rGO catalysts (a) and Pd<sub>3</sub>Ni/rGO catalysts without pH adjustment (b).

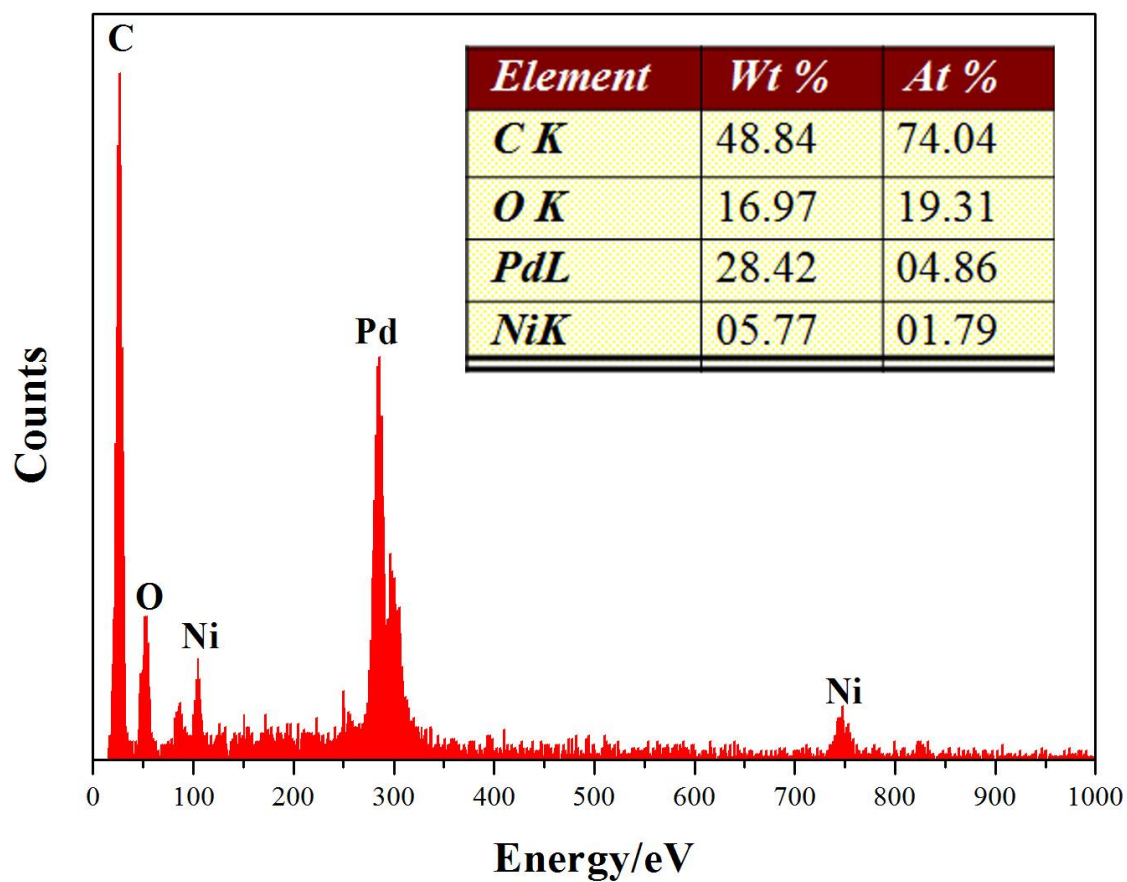

**Fig. S2.** EDX of Pd<sub>3</sub>Ni/rGO catalysts and the elemental analysis from EDX (insert).

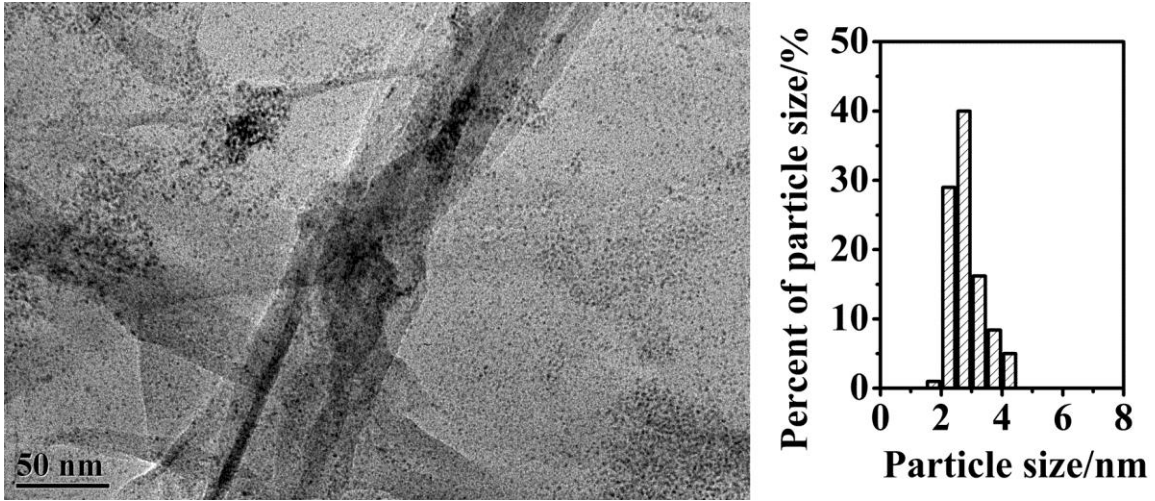

**Fig. S3.** TEM image and the average diameter and distribution of PdO&Ni(OH)<sub>2</sub>/GO.

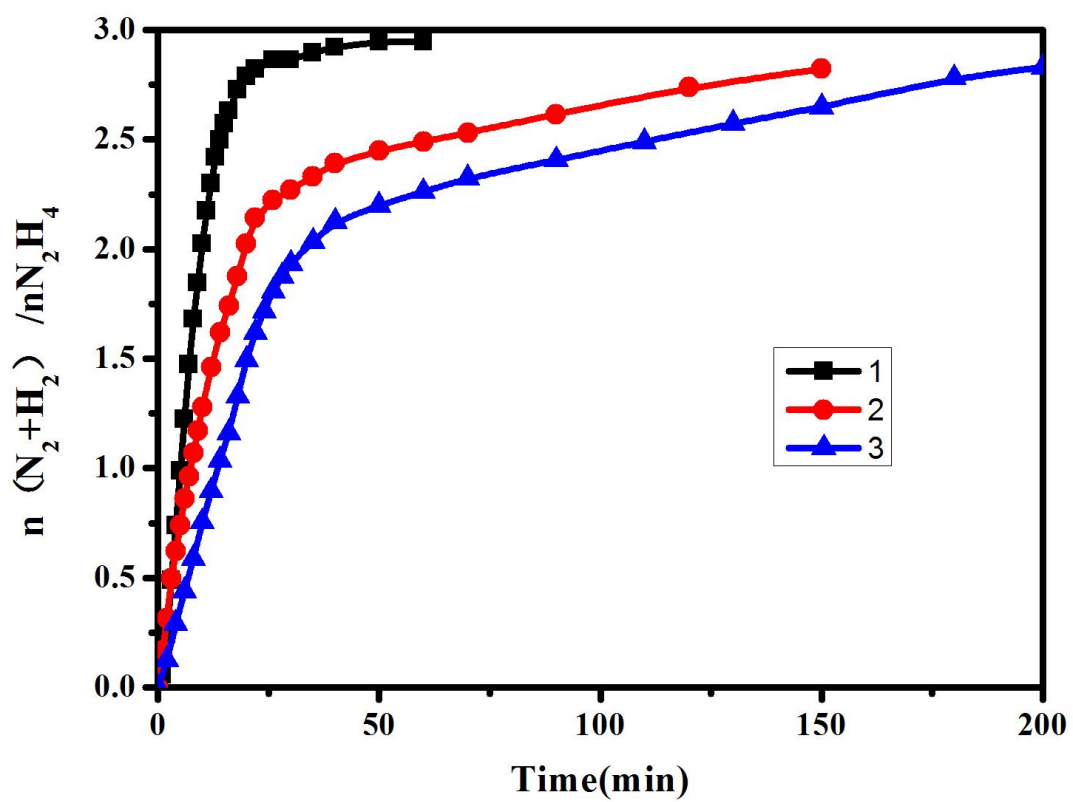

Fig. S4 Durability test of Pd<sub>3</sub>Ni/rGO after different cycles.
